# Supplementary material for: Boosting room-temperature phosphorescence via polarity-induced through-space conjugation in a host–guest doping system
Source: Royal Society of Chemistry journal article supplement (doi:10.1039/d5cc06886j), 2026-01-01
Supplement: d5cc06886j1.pdf [file d5cc06886j1.pdf]

# **Boosting Room-Temperature Phosphorescence via Polarity-Induced Through-space conjugation in a Host-Guest Doping System**

Mingyue Dong <sup>a</sup>, Kaiyu Zhang <sup>a</sup>, WanJuan Gao <sup>a</sup>, Zhenjian Qi <sup>a</sup>, Dan Li <sup>a\*</sup>, Yingchen Duan <sup>a\*</sup>,  
Fushun Liang <sup>c\*</sup> & Zhongmin Su <sup>a, b</sup>

<sup>a</sup> Jilin Provincial Science and Technology Innovation Center of Optical Materials and Chemistry, Jilin Provincial International Joint Research Center of Photo-functional Materials and Chemistry, School of Chemistry and Environment, Changchun University of Science and Technology, Changchun, 130022, China

<sup>b</sup> State Key Laboratory of Supramolecular Structure and Materials, College of Chemistry, Jilin University, Changchun, 130021, China

<sup>c</sup> College of Chemistry, Liaoning University, Shenyang, 110036, China

## **1. Experimental part**

### **1.1 Reagents and Materials**

All the chemical reagents used were purchased from Adamas Company. Unless otherwise stated, all the reagents used in the experiments were obtained from commercial sources and purified through three rounds of recrystallization.

### **1.2 Preparation of the doping material Cums/Ar-COOH**

0.3 g of PA, IPA and TMA were respectively taken into vials, 6 mL of methanol was added, and then certain amounts of 5 mg/mL guest-methanol mixed solutions were added at different molar ratios. The solutions were thoroughly stirred and dissolved until they became clear and transparent. The materials with different doping concentrations were obtained by vacuum rotary evaporation.

### **1.3 Measurements**

Steady-state photoluminescence spectra, phosphorescence spectra, and phosphorescence decay curves under ambient conditions were measured with an FL-7100 spectrometer. Phosphorescence

spectra were acquired with a delay time of 8 ms. Phosphorescence spectra were measured using Edinburgh FLS1000 at 77 K. Photoluminescence quantum yields were collected for all materials under ambient conditions using an Edinburgh FLS 1000 equipped with an integrating sphere. Photoluminescence photos were taken with an iPhone 16 Pro max under room temperature with handheld UV lamp (365 nm) illumination.

Powder X-ray diffraction (P-XRD) spectra were measured using a Shimadzu-6100 X-ray diffractometer with Cu-K $\alpha$  radiation at a wavelength of 1.542 Å. Diffraction was measured over a  $2\theta$  angle range of 5-60° and recorded at a scan rate of 1 degree per minute.

Solid-state ultraviolet-visible absorption (UV-vis) spectra were obtained using the Shimadzu UV-2600 i. Liquid-state UV-visible absorption spectra were obtained using UV-9000 s.

## 1.4 Calculation of optical physical parameters

The phosphorescence quantum yield of the compounds is given by Eq:

$$\phi_{\text{Ph}} = \frac{A_{\text{Ph}}}{A_{\text{PL}}} \times \phi_{\text{PL}}$$

Where  $A_{\text{PL}}$  and  $A_{\text{Ph}}$  represent the integration regions of the total photoluminescence and phosphorescence spectra, respectively.

The energy gap between T<sub>1</sub> and S<sub>1</sub> ( $\Delta E_{\text{ST}}$ ), as reported in the literature, is calculated as follows:

$$\Delta E_{\text{ST}} = hk \left( \frac{c}{\lambda_1} - \frac{c}{\lambda_2} \right)$$

Where  $h$  is Planck's constant ( $4.14 \times 10^{-15}$  eV·s),  $c$  is the speed of light ( $3 \times 10^{17}$  nm/s),  $k$  is the conversion constant ( $1.6 \times 10^{-19}$  J/eV), and  $\lambda_1$  and  $\lambda_2$  are the fluorescence and phosphorescence emission wavelengths, respectively.

## 1.5 Theoretical calculation

In this study, all simulations of ground- and excited-state geometries and electronic structures were performed using the Gaussian 16 package. The ground-state (S<sub>0</sub>) geometries of all molecules were

optimized at the B3LYP/def2-SVP level of density functional theory (DFT), ensuring that each structure reached the minimum-energy configuration. Based on these optimized geometries, time-dependent density functional theory (TD-DFT) calculations were subsequently carried out at the PBE0/6-31G(d,p) level to optimize the triplet excited-state ( $T_1$ ) geometries, thereby obtaining the stable molecular conformations in the excited state for further investigation of their photophysical properties.

## 2. Other properties

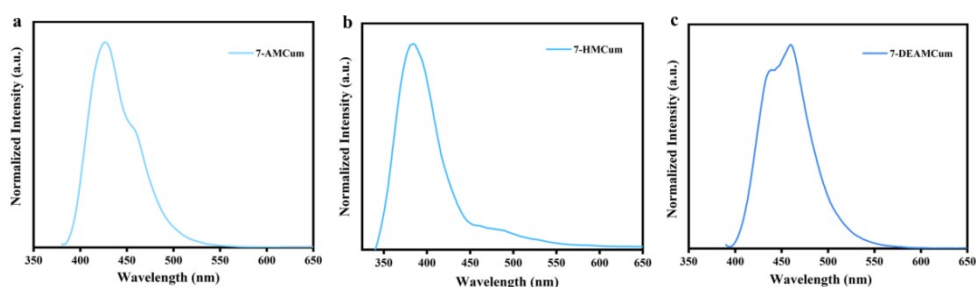

**Figure S1.** Steady-state PL Spectra of a) 7-AMCum, b) 7-HMCum, c) 7-DEAMCum in ethanol solution ( $1 \times 10^{-5}$  M) at 298 K ( $\lambda_{\text{ex}} = 318/360/330$  nm).

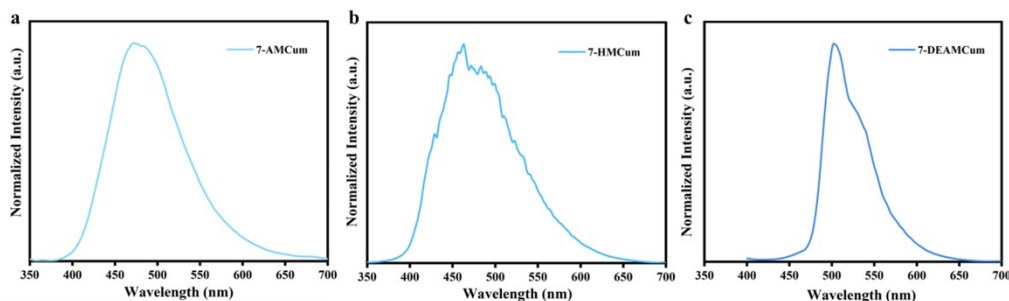

**Figure S2.** Delay Spectra of a) 7-AMCum, b) 7-HMCum c) 7-DEAMCum in ethanol solution ( $1 \times 10^{-5}$  M) at 77 K ( $\lambda_{\text{ex}} = 350/365/365$  nm).

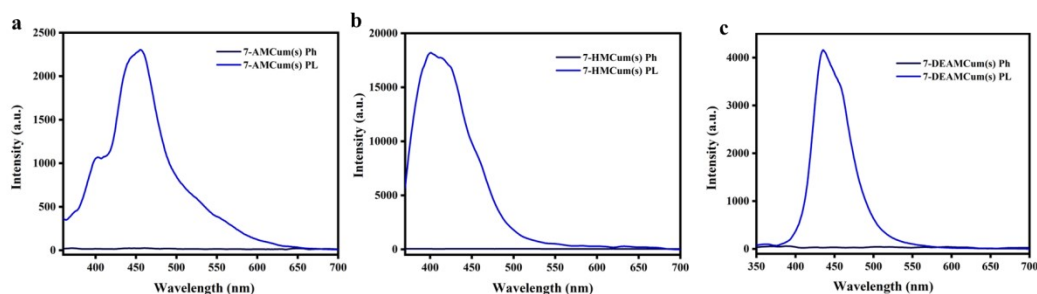

**Figure S3.** Steady-state PL spectra and delay spectra of a) 7-AMCum, b) 7-HMCum c) 7-DEAMCum in solid state at 298 K ( $\lambda_{\text{ex}} = 318/360/330$  nm, delay time = 8 ms).

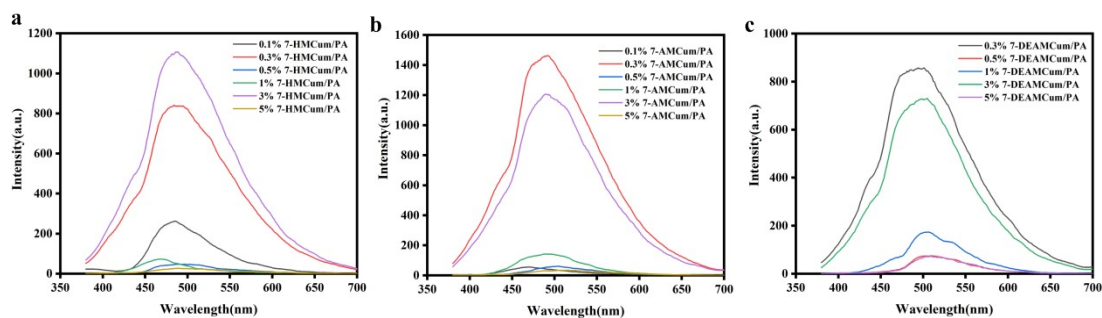

**Figure S4.** Delay spectra of a) 7-HMCum, b) 7-HMCum c) 7-DEAMCum at 298 K with different doping concentrations ( $\lambda_{\text{ex}} = 290$  nm, delay time = 8 ms).

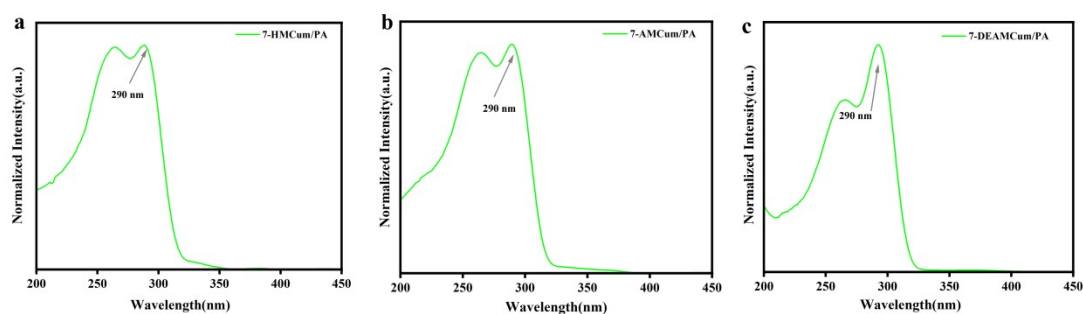

**Figure S5.** Phosphorescent Excitation spectra of a) 7-HMCum/PA, b) 7-AMCum/PA c) 7-DEAMCum/PA at 298 K ( $\lambda_{\text{em}} = 480/490/500$  nm, delay time = 8 ms).

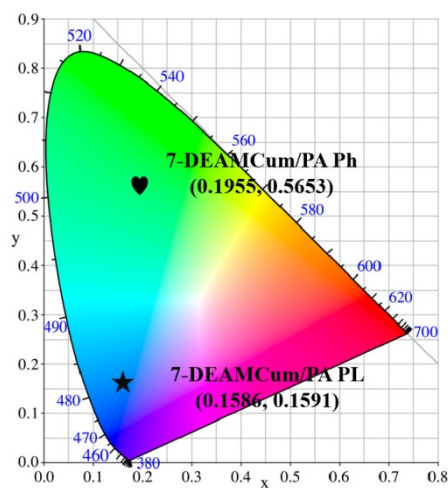

**Figure S6.** The fluorescence and phosphorescence CIE coordinates of 7-DEAMCum/PA

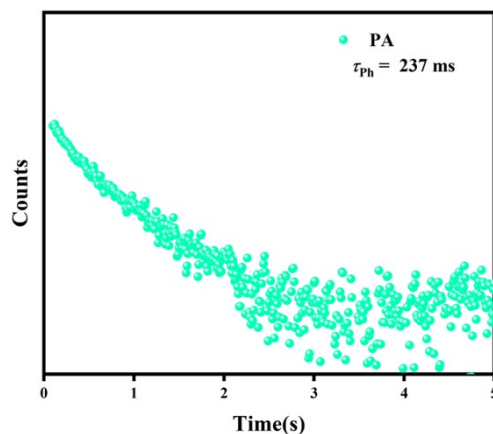

**Figure S7.** Phosphorescence decay curves of PA at 298 K

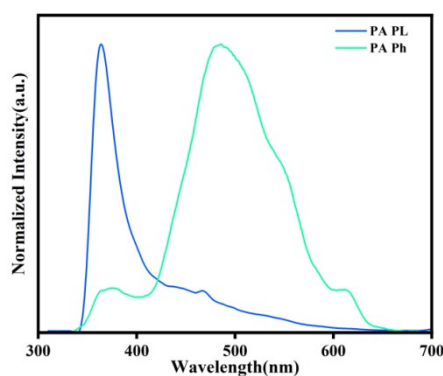

**Figure S8.** Normalized steady-state PL spectra and delayed spectra of PA at 298 K ( $\lambda_{\text{ex}} = 290$  nm, delayed time = 8 ms)

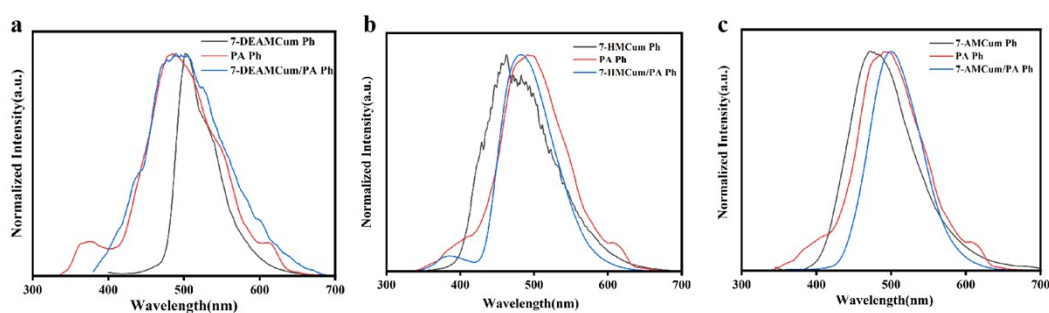

**Figure S9.** Normalized delayed spectra of a) PA, 7-DEAMCum/PA and 7-DEAMCum b) PA, 7-HMCum/PA and 7-HMCum c) PA, 7-AMCum/PA and 7-AMCum. (PA, 7-DEAMCum/PA, 7-HMCum/PA and 7-AMCum/PA are in the solid state at 298K; 7-DEAMCum, 7-HMCum and 7-AMCum in ethanol solution ( $1 \times 10^{-5}$  M) at 77 K).

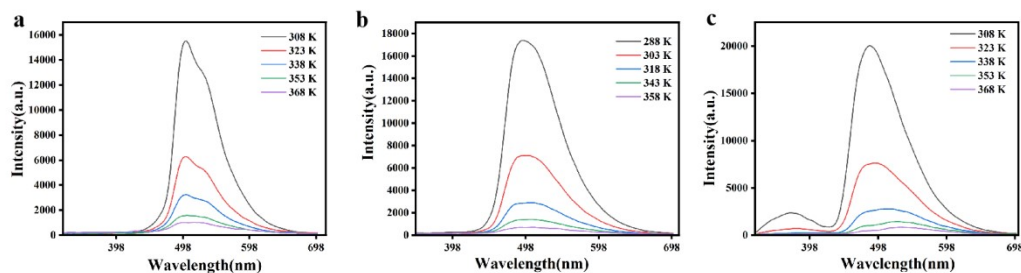

**Figure S10.** Phosphorescence spectra of a) 7-DEAMCum/PA b) 7-AMCum/PA and c) 7-HMCum/PA at different temperatures

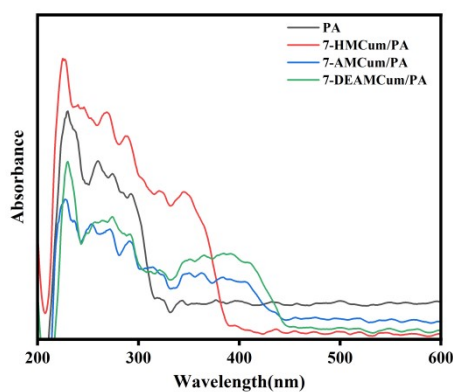

**Figure S11.** a) Solid-state UV-vis absorption spectra of PA, 7-HMCum/PA, 7-AMCum/PA, and 7-DEAMCum/PA at ambient conditions

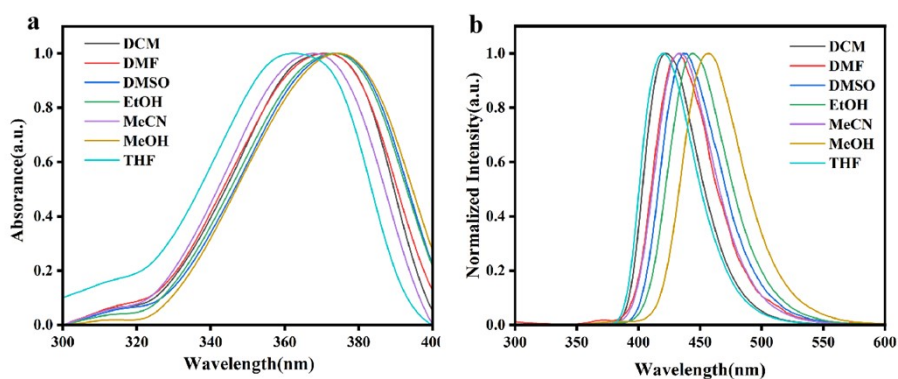

**Figure S12.** a) UV-Vis absorption spectra of 7-DEAMCum in different solvents (concentration =  $1.0 \times 10^{-5}$  M) under ambient conditions b) PL spectra of 7-DEAMCum in different solvents (concentration =  $1.0 \times 10^{-5}$  M) under ambient conditions.

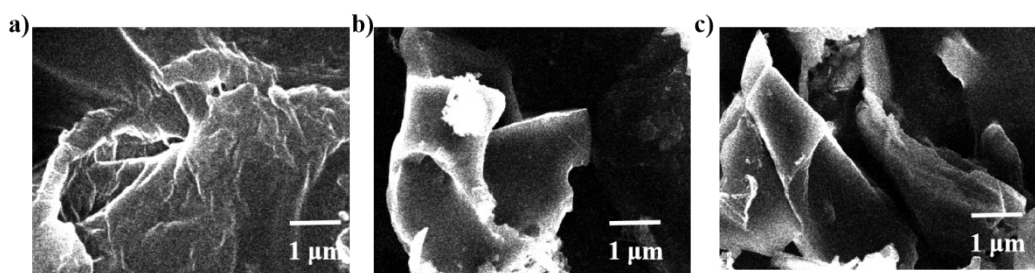

**Figure S13.** a) SEM image of PA b) SEM image of 7-AMCum/PA c) SEM image of 7-HMCum/PA.

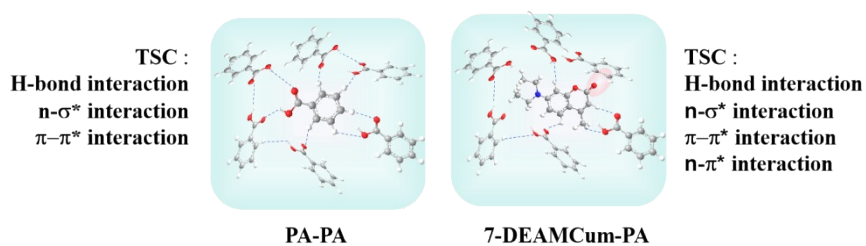

**Figure S14.** The changes in through-space conjugation (TSC) before and after the mixing of the host and guest.

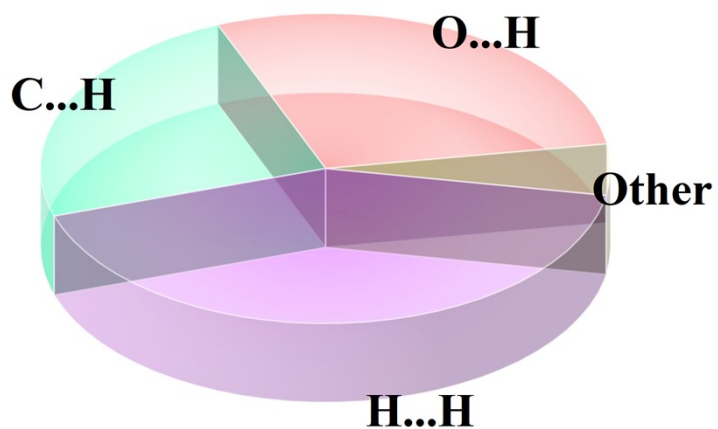

**Figure S15.** Pie chart (PA-PA) of the relative contribution of the Surface area of Hirshfeld Surface.

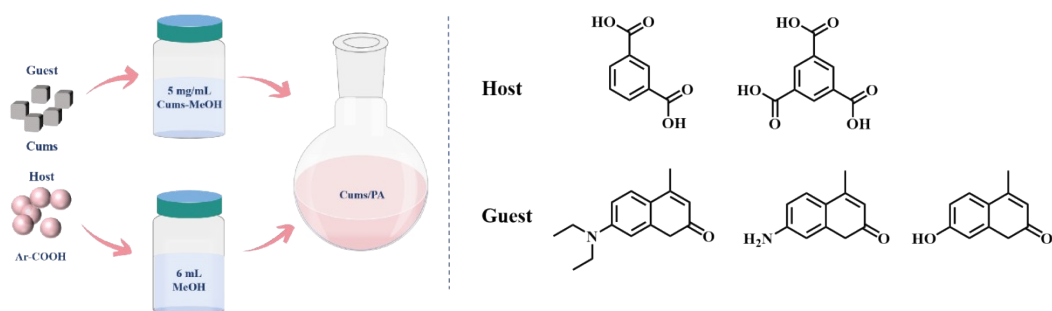

**Figure S16.** Flowchart of the general applicability experiment and chemical structures of the host-guest materials.

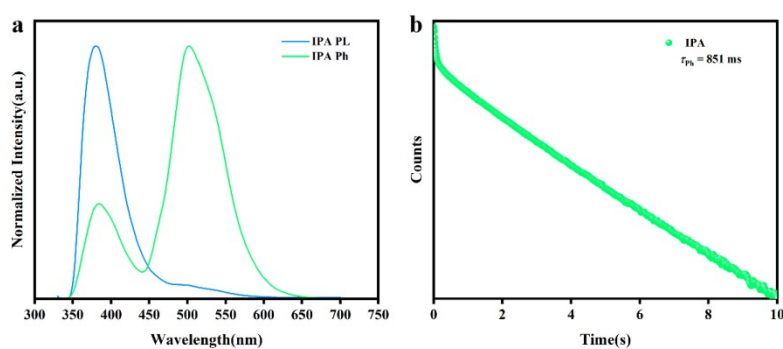

**Figure S17.** a) Normalized steady-state PL spectra and delayed spectra of IPA at 298 K ( $\lambda_{ex} = 275$  nm, delayed time = 8 ms) b) Phosphorescence decay curves of IPA at 298 K

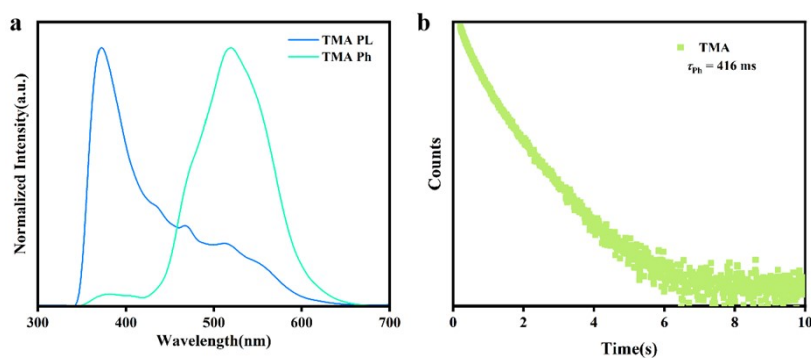

**Figure S18.** a) Normalized steady-state PL spectra and delayed spectra of TMA at 298 K ( $\lambda_{ex} = 275$  nm, delayed time = 8 ms) b) Phosphorescence decay curves of TMA at 298 K



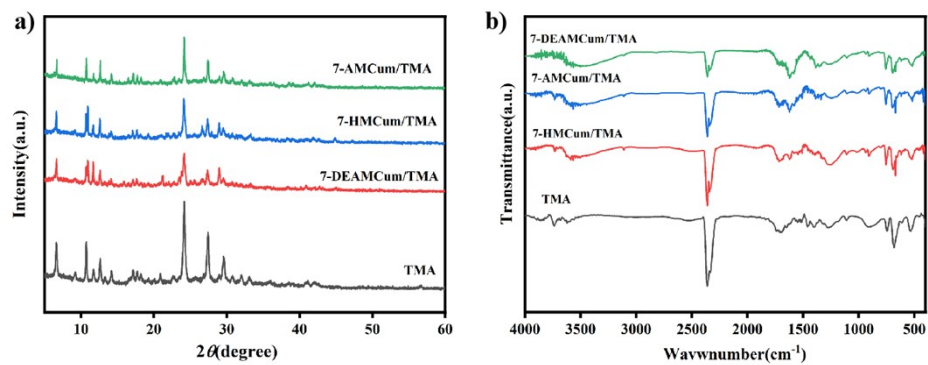

**Figure 19.** a) P-XRD patterns of TMA, 7-HMCum/TMA, 7-AMCum/TMA and 7-DEAMCum/TMA b) FT-IR spectra of TMA, 7-HMCum/TMA, 7-AMCum/TMA and 7-DEAMCum/TMA

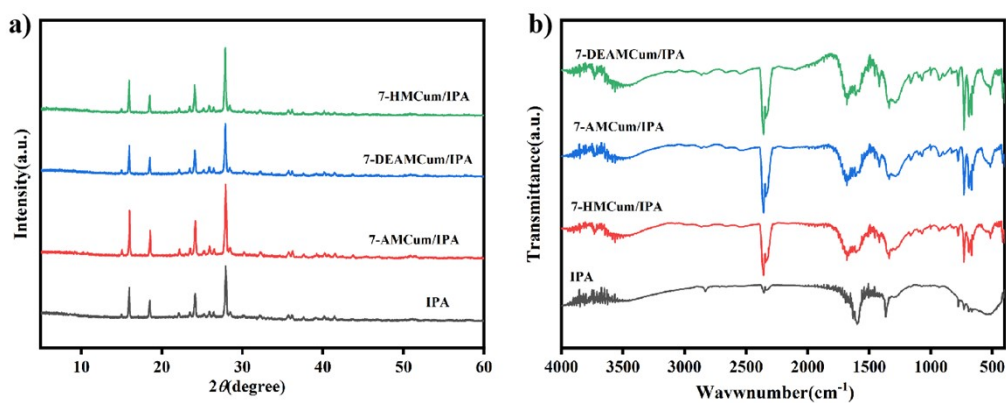

**Figure 20.** a) P-XRD patterns of IPA, 7-HMCum/IPA, 7-AMCum/IPA and 7-DEAMCum/IPA b) FT-IR spectra of IPA, 7-HMCum/IPA, 7-AMCum/IPA and 7-DEAMCum/IPA

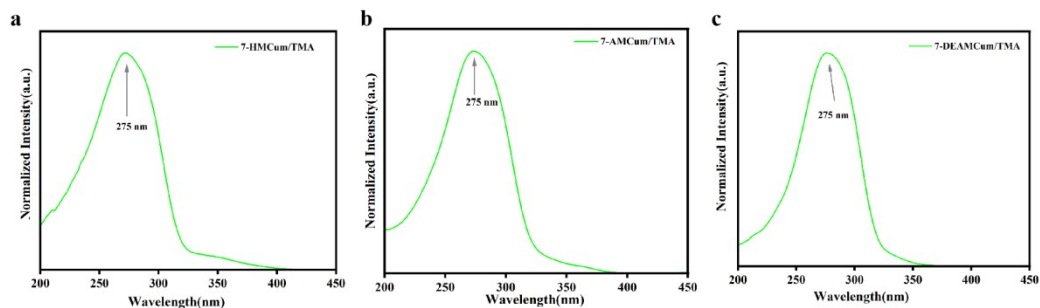

**Figure S21.** Phosphorescent Excitation spectra of a) 7-HMCum/TMA, b) 7-AMCum/TMA c) 7-DEAMCum/TMA at 298 K ( $\lambda_{em}$  = 540/537/540 nm, delay time = 8 ms).

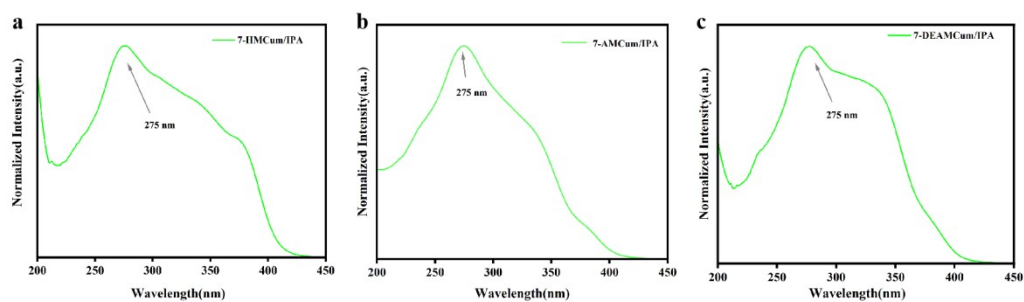

**Figure S22.** Phosphorescent Excitation spectra of a) 7-HMCum/IPA, b) 7-AMCum/IPA c) 7-DEAMCum/IPA at 298 K ( $\lambda_{em} = 506/506/506$  nm, delay time = 8 ms).

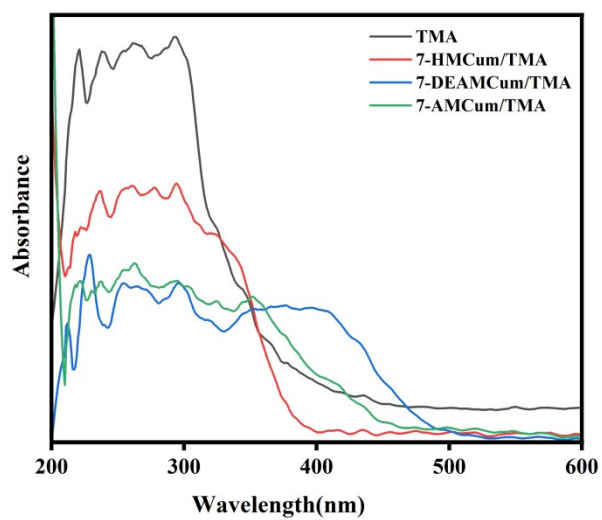

**Figure S23.** a) Solid-state UV-vis absorption spectra of TMA, 7-HMCum/TMA, 7-AMCum/TMA, and 7-DEAMCum/TMA at ambient conditions

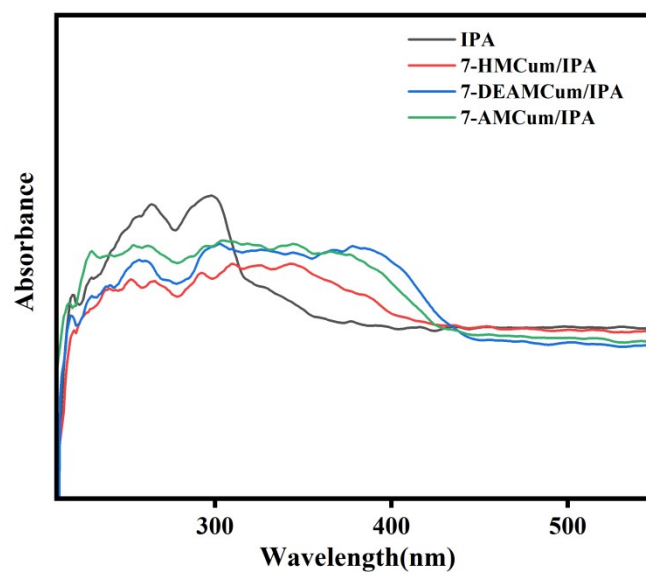

**Figure S24.** a) Solid-state UV-vis absorption spectra of IPA, 7-HMCum/IPA, 7-AMCum/IPA, and 7-DEAMCum/IPA at ambient conditions

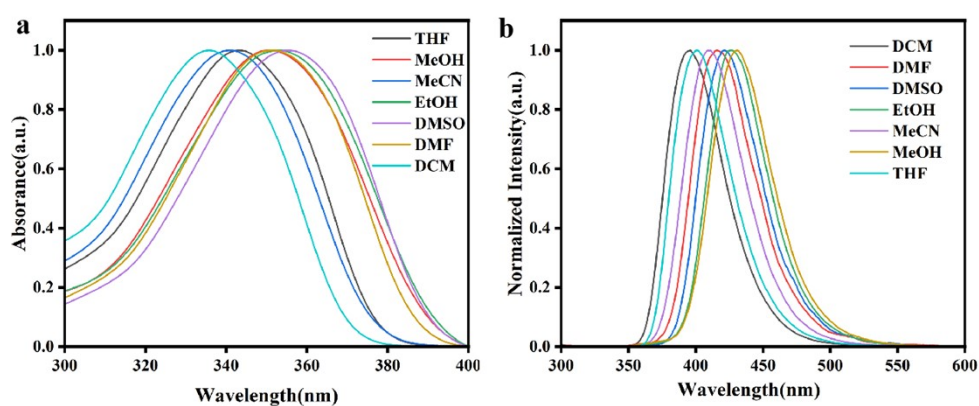

**Fig. S25** a) UV-Vis absorption spectra of 7-AMCum in different solvents (concentration =  $1.0 \times 10^{-5}$  M) under ambient conditions b) PL spectra of 7-AMCum in different solvents (concentration =  $1.0 \times 10^{-5}$  M) under ambient conditions.

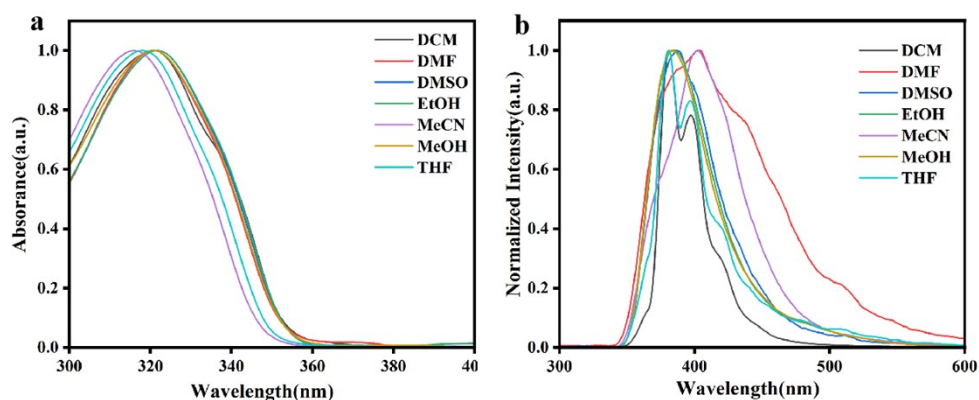

**Fig. S26** a) UV-Vis absorption spectra of 7-HMCum in different solvents (concentration =  $1.0 \times 10^{-5}$  M) under ambient conditions b) PL spectra of 7-HMCum in different solvents (concentration =  $1.0 \times 10^{-5}$  M) under ambient conditions.

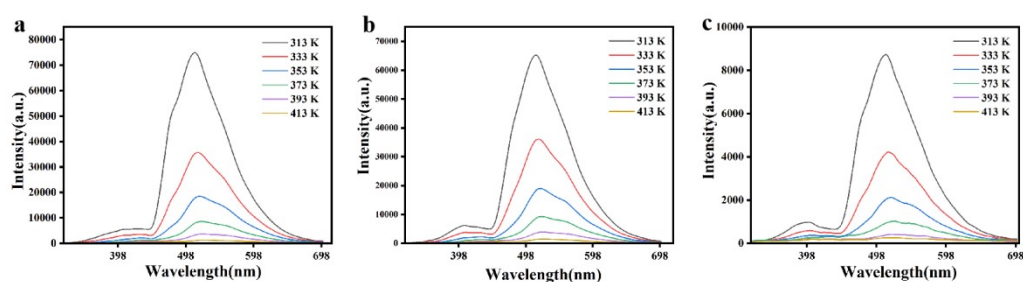

**Figure S27.** Phosphorescence spectra of a) 7-DEAMCum/IPA b) 7-AMCum/IPA and c) 7-HMCum/IPA at different temperatures

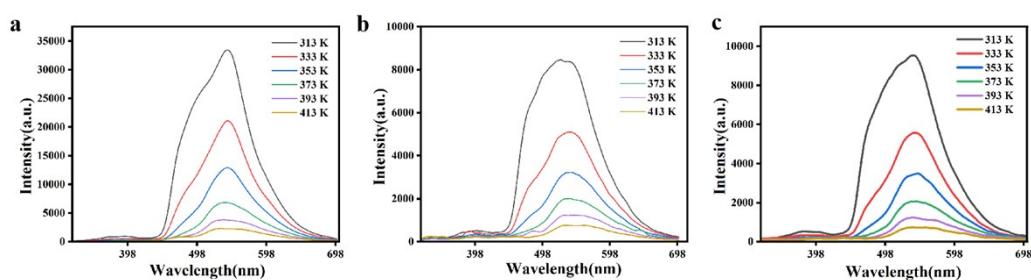

**Figure S28.** Phosphorescence spectra of a) 7-DEAMCum/TMA b) 7-AMCum/TMA and c) 7-HMCum/TMA at different temperatures

**Table S1.** Dipole moment values of coumarin derivatives in the ground and excited states.

| Sample    | The ground state dipole moment | The excited state dipole moment |
|-----------|--------------------------------|---------------------------------|
| 7-HMCum   | 4.31                           | 4.05                            |
| 7-AMCum   | 6.80                           | 6.72                            |
| 7-DEAMCum | 7.06                           | 7.09                            |

**Table S2.** Transition dipole moments of coumarin derivatives.

| Sample    | $\mu_{T_1 \rightarrow S_0}^1$ | $\mu_{T_1 \rightarrow S_0}^2$ | $\mu_{T_1 \rightarrow S_0}^3$ | $\mu_{T_1 \rightarrow S_0}$ |
|-----------|-------------------------------|-------------------------------|-------------------------------|-----------------------------|
| 7-HMCum   | $2.00 \times 10^{-5}$         | $2.24 \times 10^{-5}$         | $1.00 \times 10^{-5}$         | $1.75 \times 10^{-5}$       |
| 7-AMCum   | $2.00 \times 10^{-5}$         | $2.24 \times 10^{-5}$         | $3.00 \times 10^{-5}$         | $2.41 \times 10^{-5}$       |
| 7-DEAMCum | $2.45 \times 10^{-5}$         | $2.37 \times 10^{-5}$         | $4.12 \times 10^{-5}$         | $2.98 \times 10^{-5}$       |

**Table S3.** Intermolecular interaction energy.

|   | $E_{com1}^a$ (au) | $E_{com2}^b$ (au) | $E_{7-DEAMCum}^c$ (au) | $E_{PA}^d$ (au) | $E_{mt1}^e$ (au) | $E_{mt2}^f$ (au) |
|---|-------------------|-------------------|------------------------|-----------------|------------------|------------------|
| 1 | -420.8550871      | -420.8550438      | -591.9770708           | -421.0209149    | 592.1428986      | 421.1867860      |
| 2 | -420.8549571      | -420.8550162      | -591.9770708           | -421.0209149    | 592.1430286      | 421.1868136      |
| 3 | -420.8549267      | -420.8551430      | -591.9770708           | -421.0209149    | 592.1430590      | 421.1866868      |
| 4 | -420.8549571      | -420.8549190      | -591.9770708           | -421.0209149    | 592.1430286      | 421.1869108      |
| 5 | -420.8550375      | -420.8550040      | -591.9770708           | -421.0209149    | 592.1429482      | 421.1868258      |

<sup>a</sup> The energy of the 7-DEAMCum/PA composite system.

<sup>b</sup> The energy of the PA/PA composite system.

<sup>c</sup> The energy of 7-DEAMCum.

<sup>d</sup> The energy of PA.

<sup>e</sup> 7-DEAM Cum/PA interaction energy.

<sup>f</sup> PA/PA interaction energy.

**Table S4.** Photophysical data of host (PA, IPA and TMA), guest (C,CCA and CE), and doped materials.

| Sample <sup>a</sup> | $\lambda_{\text{f}}^{\text{b}}$ (nm) | $\phi_{\text{f}}^{\text{c}}$ (%) | $\lambda_{\text{p}}^{\text{d}}$ (nm) | $\tau_{\text{p}}^{\text{e}}$ (ms) | $\phi_{\text{p}}^{\text{f}}$ (%) | $\phi_{\text{PL}}^{\text{g}}$ (%) | $k_{\text{p}}^{\text{i}}$ (s <sup>-1</sup> ) | $k_{\text{nr}}^{\text{j}}$ (s <sup>-1</sup> ) |
|---------------------|--------------------------------------|----------------------------------|--------------------------------------|-----------------------------------|----------------------------------|-----------------------------------|----------------------------------------------|-----------------------------------------------|
| PA                  | 364                                  | 1.31                             | 484                                  | 237                               | 3.56                             | 5.94                              | $1.50 \times 10^{-1}$                        | $4.07 \times 10^0$                            |
| IPA                 | 378                                  | 1.38                             | 501                                  | 851                               | 5.52                             | 6.90                              | $6.49 \times 10^{-2}$                        | $1.11 \times 10^0$                            |
| TMA                 | 374                                  | 0.30                             | 524                                  | 416                               | 0.20                             | 0.10                              | $4.81 \times 10^{-3}$                        | $2.4 \times 10^0$                             |
| 7-HMCum/PA          | 385                                  | 0.32                             | 482                                  | 246                               | 0.13                             | 0.55                              | $5.28 \times 10^{-3}$                        | $4.06 \times 10^0$                            |
| 7-AMCum/PA          | 365                                  | 1.31                             | 493                                  | 473                               | 0.46                             | 1.77                              | $9.73 \times 10^{-3}$                        | $2.10 \times 10^0$                            |
| 7-DEAMCum/PA        | 391                                  | 1.02                             | 502                                  | 732                               | 0.46                             | 1.48                              | $6.28 \times 10^{-3}$                        | $1.30 \times 10^0$                            |
| 7-HMCum/IPA         | 389                                  | 4.06                             | 506                                  | 883                               | 1.38                             | 5.42                              | $5.61 \times 10^{-2}$                        | $4.01 \times 10^0$                            |
| 7-AMCum/IPA         | 391                                  | 2.11                             | 506                                  | 912                               | 1.08                             | 3.19                              | $1.18 \times 10^{-2}$                        | $1.18 \times 10^{-2}$                         |
| 7-DEAMCum/IPA       | 377                                  | 2.65                             | 507                                  | 969                               | 1.08                             | 3.73                              | $1.11 \times 10^{-2}$                        | $1.11 \times 10^{-2}$                         |
| 7-HMCum/TMA         | 355                                  | 0.20                             | 540                                  | 438                               | 0.22                             | 0.42                              | $5.02 \times 10^{-3}$                        | $2.28 \times 10^0$                            |
| 7-AMCum/TMA         | 378                                  | 0.07                             | 537                                  | 458                               | 0.05                             | 0.12                              | $1.09 \times 10^{-3}$                        | $2.18 \times 10^0$                            |
| 7-DEAMCum/TMA       | 340                                  | 0.02                             | 540                                  | 466                               | 0.08                             | 0.10                              | $1.72 \times 10^{-3}$                        | $2.14 \times 10^0$                            |

<sup>a</sup> Doping concentrations of different materials were PA, IPA, TMA and optimal concentration of Cums/Ar-COOH doped material.

<sup>b</sup> Excitation wavelength.

<sup>c</sup> Fluorescence emission wavelength.

<sup>d</sup> Fluorescence quantum yield.

<sup>e</sup> Phosphorescence emission wavelength.

<sup>f</sup> Phosphorescence lifetime at room temperature.

<sup>g</sup> Phosphorescence quantum yield.

<sup>h</sup> Photoluminescence quantum yield.

<sup>i</sup>  $k_p$  is the radiative rate constant,  $k_p = \phi_p / \tau_p$ .

<sup>j</sup>  $k_{nr}$  is the nonradiative rate constant of the  $T_1$  state,  $k_{nr} = (1 - \phi_p) / \tau_p$ .<sup>a</sup>
